# Supplementary material for: Delineating the transcriptional landscape and clonal diversity of virus-specific CD4+ T cells during chronic viral infection
Source: eLife journal article supplement (doi:10.7554/elife.80079), 2022-10-18

Figure 4-Figure supplement 1

**A**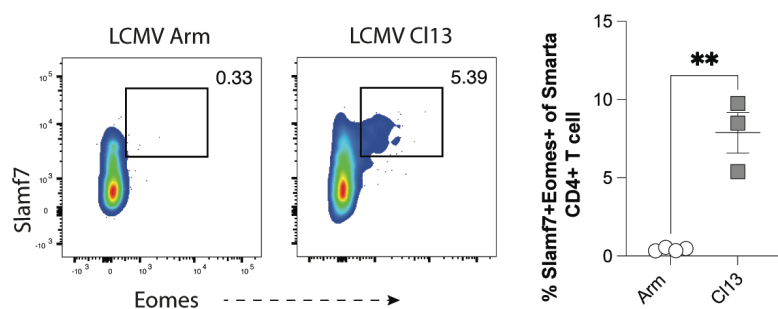**B**

Genes upregulated in Memory CD8 T cells vs. Effector cells

Geneset GSE9650\_Wherry et al. *Immunity* 2007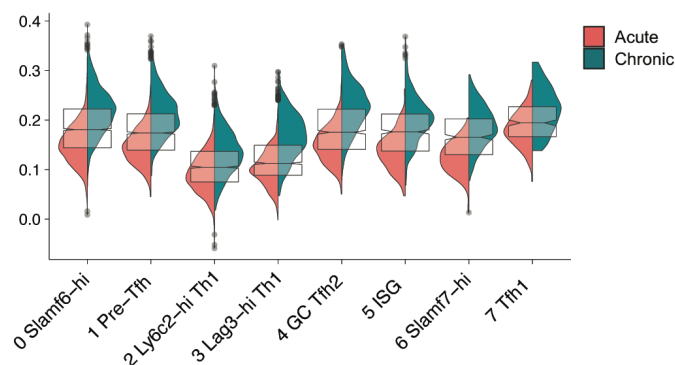**C**

Geneset\_Tcmp

Tcmp signature Ciucci et al. *Immunity* 2019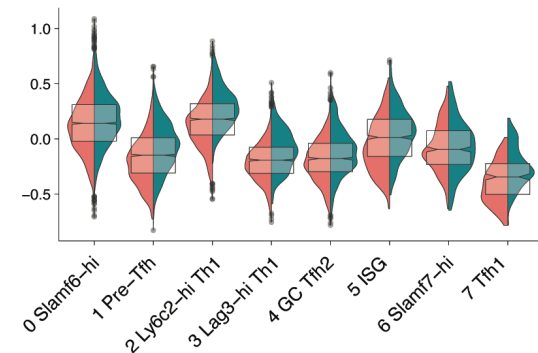**D**

Geneset\_T\_progenitor

T effector signature Zander et al. *Immunity* 2019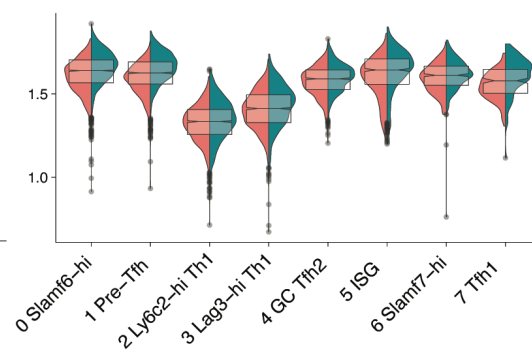**E**

Geneset\_T\_Effector

T effector signature Zander et al. *Immunity* 2019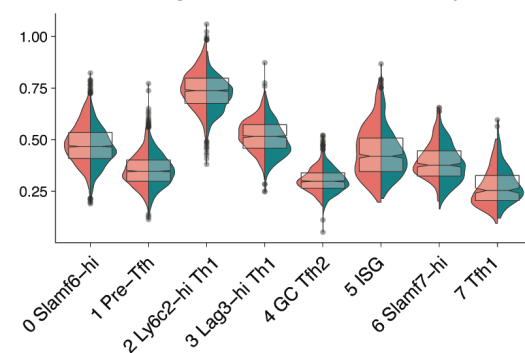**F**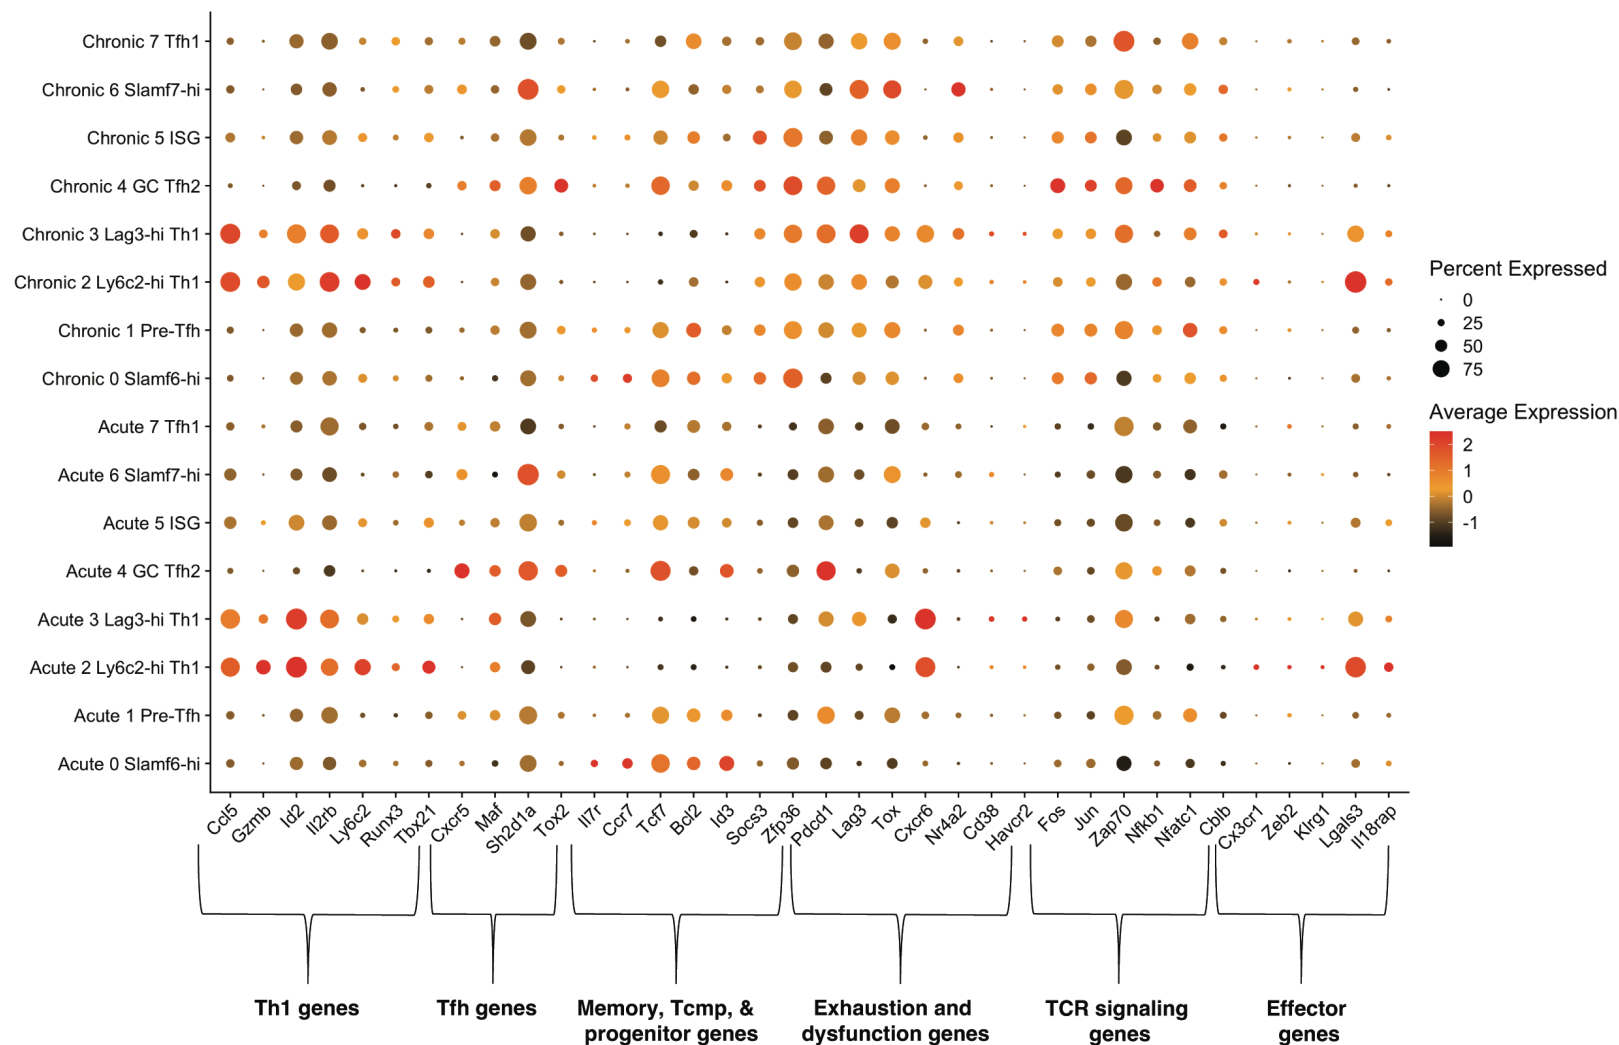

Supplement: supp [file elife_poa_e80079_Figure_4_figure_supplement_1.pdf › elife_poa_e80079_Figure_4_figure_supplement_1.pdf]
