# Supplementary material for: Delineating the transcriptional landscape and clonal diversity of virus-specific CD4+ T cells during chronic viral infection
Source: eLife. 2022 Oct 18;11:e80079. doi: 10.7554/eLife.80079 (PMC9629829; doi:10.7554/eLife.80079)
Supplement: Supplementary file 1. [file elife-80079-supp1.xls]

## Sheet: Supplementary File 1
Clonal Distribution and cellular fate of 176 GP66-specific CD4 T cell clones (with 4 or more cells per clone, from two individual mice infected with LCMV Cl13)
	combined_cdr3_nt	orig.ident	Monocle_Th1	Monocle_Slamf6Hi_CD4	Monocle_Tfh	Percent_Monocle_Slamf6Hi_CD4	Percent_Monocle_Tfh	Percent_Monocle_Th1	Total_cells	Fate	clone_number	Th1_module_score	TFH_module_score	Th1	TFH	Th1_modulescore_percentile	TFH_modulescore_percentile
1	TRA:TGTGCAGCAAATAGCAACTATCAGTTGATCTGG_TRB:TGTGCCTGGAGTCTTCAGGACAATTCCTATGAACAGTACTTC	CD4_M2	92	35	88	16.2791	40.9302	42.7907	215	Multifate	1	0.617193	0.424121	0	0	0.409	0.494063
2	TRA:TGTGCAGCAAGTGGGGACATGGGCTACAAACTTACCTTC_TRB:TGTGCTAGCAGTTCCCCCGGGACTGGGGAAGACACCCAGTACTTT	CD4_M2	49	77	57	42.0765	31.1475	26.776	183	Multifate	2	0.576927	0.383223	0	0	0.375376	0.457473
3	TRA:TGTGCAGCAGAATATAACAACAATGCCCCACGATTT_TRB:TGTGCCTGGAGGGACTGGGGGGTCCAAGACACCCAGTACTTT	CD4_M1	112	28	38	15.7303	21.3483	62.9213	178	Multifate	3	0.752657	0.247444	0	0	0.52212	0.335994
4	TRA:TGTGCAGCAAGCATGGGGGACATGGGCTACAAACTTACCTTC_TRB:TGTGCTAGCAGTCTCATAAATTCTGGAAATACGCTCTATTTT	CD4_M1	39	34	104	19.209	58.7571	22.0339	177	Multifate	4	0.514033	0.374273	0	0	0.322856	0.449465
5	TRA:TGTGCAGCCTCTGGGGCCAATACCAACAAAGTCGTCTTT_TRB:TGTGCCAGCAGTGATCACAATTCTGGAAATACGCTCTATTTT	CD4_M1	43	70	57	41.1765	33.5294	25.2941	170	Multifate	5	0.559845	0.327286	0	0	0.361111	0.407426
6	TRA:TGCGCAGCAGACAATACCAACAAAGTCGTCTTT_TRB:TGTGCCTCCCGGGACTGGGGGGGAGACACCCAGTACTTT	CD4_M2	53	57	45	36.7742	29.0323	34.1935	155	Multifate	6	0.581284	0.351353	0	0	0.379015	0.428959
7	TRA:TGTGCAGCAAGTCACTACAGCAACAACAGACTTACTTTG_TRB:TGTGCCTGGAGTTCGGGACTTAGCTCCTATGAACAGTACTTC	CD4_M1	78	42	22	29.5775	15.493	54.9296	142	Multifate	7	0.684966	0.270184	0	0	0.465595	0.356339
8	TRA:TGTGCAGCAAGTGTGTATAACCAGGGGAAGCTTATCTTT_TRB:TGTGCCTGGAGCCCAATCTCCGACTACACCTTC	CD4_M1	38	45	49	34.0909	37.1212	28.7879	132	Multifate	8	0.598738	0.311161	0	0	0.393589	0.393
9	TRA:TGTGCAGCAAGGGGAGGCAATACCGGAAAACTCATCTTT_TRB:TGTGCCTCCCGGGACTGGGGGGGAGACACCCAGTACTTT	CD4_M2	44	22	45	19.8198	40.5405	39.6396	111	Multifate	9	0.566591	0.39024	0	0	0.366745	0.46375
10	TRA:TGTGCAGCCCTTTATGGGAGCAGTGGCAACAAGCTCATCTTT_TRB:TGTGCCTGGAGTCAGGCAGCTGAGCAGTTCTTC	CD4_M1	42	20	38	20	38	42	100	Multifate	10	0.664046	0.324195	0	0	0.448125	0.404661
11	TRA:TGTGCAGCAAGTGACACCAATACAGGCAAATTAACCTTT_TRB:TGTGCCAGCGGTGATAAAGGGACAGGAGACGAAAGATTATTTTTC	CD4_M1	57	12	22	13.1868	24.1758	62.6374	91	Multifate	11	0.757757	0.235951	0	0	0.526379	0.325711
12	TRA:TGTGCAGCAAGTGAGAATTATAACCAGGGGAAGCTTATCTTT_TRB:TGTGCCTGGAGTCTCTGGGGCTCCGACTACACCTTC	CD4_M2	49	16	19	19.0476	22.619	58.3333	84	Multifate	12	0.7472	0.271071	0	0	0.517564	0.357133
13	TRA:TGTGCAGCGAGCAATAACAACAATGCCCCACGATTT_TRB:TGTGCCAGCAGTGCCGGGACTGGGGCAAACACCGGGCAGCTCTACTTT	CD4_M2	24	28	28	35	35	30	80	Multifate	13	0.568841	0.38871	0	0	0.368623	0.462382
14	TRA:TGTGCAGGGGATACTGGAGGACTAAGTGGTAAATTAACATTC_TRB:TGTGCCTGGGCCGGGACAGGGGAACAGTACTTC	CD4_M1	35	27	15	35.0649	19.4805	45.4545	77	Multifate	14	0.66338	0.29482	0	0	0.447569	0.37838
15	TRA:TGTGCAGTGAGCATGGACACTGGAGCTAACACTGGAAAGCTCACGTTT_TRB:TGTGCCTGGAGTCTAATGGCAGAGTATAATTCGCCCCTCTACTTT	CD4_M2	35	11	26	15.2778	36.1111	48.6111	72	Multifate	15	0.642522	0.3767	0	0	0.430152	0.451636
16	TRA:TGTGCAGCAAGTGCGAGCAACAACAGACTTACTTTG_TRB:TGTGCCAGCAGTGACAGTAACAACCAGGCTCCGCTTTTT	CD4_M1	25	23	23	32.3944	32.3944	35.2113	71	Multifate	16	0.599849	0.330295	0	0	0.394517	0.410118
17	TRA:TGTGCTTTGGAACCAAGCAACTATCAGTTGATCTGG_TRB:TGTGCCTGGGCATACACAGAAGTCTTCTTT	CD4_M2	48	7	11	10.6061	16.6667	72.7273	66	Th1	17	0.789126	0.234293	1	0	0.552574	0.324228
18	TRA:TGTGCAGCATCCCCGAATACCAACAAAGTCGTCTTT_TRB:TGTGCCAGCGGTGACTGGGGGGTCCAAGACACCCAGTACTTT	CD4_M1	21	18	21	30	35	35	60	Multifate	18	0.581138	0.340042	0	0	0.378892	0.418839
19	TRA:TGTGCAGCAAGTTGGAGTTACCAGAACTTCTATTTT_TRB:TGTGCCAGCAGTGCCCTCGGGACAGAGGGGAATTCGCCCCTCTACTTT	CD4_M2	24	21	13	36.2069	22.4138	41.3793	58	Multifate	19	0.585373	0.332264	0	0	0.382428	0.41188
20	TRA:TGTGCAGCAAGTCCTGGAGGCAATAATAAGCTGACTTTT_TRB:TGTGCCTGGAGTCTGGGGGACGAAAGATTATTTTTC	CD4_M1	16	13	24	24.5283	45.283	30.1887	53	Multifate	20	0.582029	0.385886	0	0	0.379637	0.459855
21	TRA:TGTGCTGCTGAGGATAGCAACTATCAGTTGATCTGG_TRB:TGTGCCTGGAGCAAGGACAGTTCCGACTACACCTTC	CD4_M1	16	13	24	24.5283	45.283	30.1887	53	Multifate	21	0.587201	0.343963	0	0	0.383956	0.422347
22	TRA:TGTGCAGCAAGTATGAATTATAACCAGGGGAAGCTTATCTTT_TRB:TGTGCCTGGAGGACGGATGCAAACTCCGACTACACCTTC	CD4_M2	27	14	11	26.9231	21.1538	51.9231	52	Multifate	22	0.647531	0.307799	0	0	0.434334	0.389992
23	TRA:TGTGCAGCAAGTCCCGGAGGCAATAATAAGCTGACTTTT_TRB:TGTGCCTGGATCAGGGGTCCAGAAACGCTGTATTTT	CD4_M2	13	8	28	16.3265	57.1429	26.5306	49	Multifate	23	0.501089	0.430688	0	0	0.312047	0.499938
24	TRA:TGTGCAGCAAGCCCTTCCAATACCAACAAAGTCGTCTTT_TRB:TGTGCCAGCAGTGATCACAATTCTGGAAATACGCTCTATTTT	CD4_M1	25	15	8	31.25	16.6667	52.0833	48	Multifate	24	0.647804	0.23764	0	0	0.434562	0.327222
25	TRA:TGTGCAGCGGACTACAGCAACAACAGACTTACTTTG_TRB:TGTGCCAGCGGCGACTGGGGGTCCCTCTATGAACAGTACTTC	CD4_M1	19	11	18	22.9167	37.5	39.5833	48	Multifate	25	0.614676	0.29707	0	0	0.406898	0.380393
26	TRA:TGTGCAGCAAGTTACAATAACAACAATGCCCCACGATTT_TRB:TGTGCCAGCGGTGATCCGGGGGGGTGGGACCAAGACACCCAGTACTTT	CD4_M1	26	16	5	34.0426	10.6383	55.3191	47	Multifate	26	0.657288	0.233864	0	0	0.442482	0.323844
27	TRA:TGTGCTCTGGGTGGTCACACTGGAGCTAACACTGGAAAGCTCACGTTT_TRB:TGTGCCAGCAGTGATCACAATTCTGGAAATACGCTCTATTTT	CD4_M1	12	24	11	51.0638	23.4043	25.5319	47	Multifate	27	0.559642	0.28303	0	0	0.360942	0.367832
28	TRA:TGTGCAGCAAGTGCAGGGACAGGCAATACCGGAAAACTCATCTTT_TRB:TGTGCCTGGAGTCTAGTCGAAAGATTATTTTTC	CD4_M2	18	16	13	34.0426	27.6596	38.2979	47	Multifate	28	0.559943	0.349819	0	0	0.361193	0.427587
29	TRA:TGCGCAGTCAGGGAGGAAACTACAAACCTACGTTTG_TRB:TGTGCCTGGAGTTCGGGACTTAGCTCCTATGAACAGTACTTC	CD4_M1	18	20	5	46.5116	11.6279	41.8605	43	Multifate	29	0.684413	0.244113	0	0	0.465132	0.333013
30	TRA:TGTGCAGCAAGCAACACCAATACAGGCAAATTAACCTTT_TRB:TGTGCCAGCGGTGATGCAGGGACAGGGAACGAAAGATTATTTTTC	CD4_M2	27	0	13	0	32.5	67.5	40	Th1	30	0.743598	0.315075	1	0	0.514555	0.396502
31	TRA:TGTGCACTGGGTAATGTTGGTGACAACAGTAAGCTGATTTGG_TRB:TGTGCCTGGAGTCTAGCCGACTCCGACTACACCTTC	CD4_M2	16	8	14	21.0526	36.8421	42.1053	38	Multifate	31	0.598772	0.374757	0	0	0.393618	0.449898
32	TRA:TGTGCAGCAACGTCTAATTACAACGTGCTTTACTTC_TRB:TGTGCCAGCAGAGGACTGGGGGGGCAGGATGACACCTTGTACTTT	CD4_M2	10	7	16	21.2121	48.4848	30.303	33	Multifate	32	0.565027	0.370349	0	0	0.365439	0.445954
33	TRA:TGTGCAGCTAGTGAGCATGCGGGAGGAAGCAATGCAAAGCTAACCTTC_TRB:TGTGCCAGCGGTGATCCGGGGGGGTGGGACCAAGACACCCAGTACTTT	CD4_M1	10	18	4	56.25	12.5	31.25	32	Multifate	33	0.583027	0.264757	0	0	0.38047	0.351483
34	TRA:TGTGCAGCAAGCGATGGAGGCAGCAATTACAAACTGACATTT_TRB:TGTGCCTGGAGTCTCGCCGACGAAAGATTATTTTTC	CD4_M1	21	4	4	13.7931	13.7931	72.4138	29	Th1	34	0.774195	0.206621	1	0	0.540105	0.29947
35	TRA:TGTGCAGCAAGCAGGAATTACAACGTGCTTTACTTC_TRB:TGTGCCAGCAGTGATGGGACAGGAGCAAACACAGAAGTCTTCTTT	CD4_M2	8	8	11	29.6296	40.7407	29.6296	27	Multifate	35	0.547095	0.314089	0	0	0.350464	0.395619
36	TRA:TGTGCAGCAAGCCCTTCCAATACCAACAAAGTCGTCTTT_TRB:TGTGCCAGCAGTGAGACTGGGGGGAACACCGGGCAGCTCTACTTT	CD4_M2	2	7	18	25.9259	66.6667	7.40741	27	TFH	36	0.460802	0.491686	0	1	0.278405	0.554512
37	TRA:TGTGCAGCAAGTCCGGGTTACCAGAACTTCTATTTT_TRB:TGTGCTAGCAGTCCGACCGGGACAGGGGTAGACACCCAGTACTTT	CD4_M1	9	6	11	23.0769	42.3077	34.6154	26	Multifate	37	0.54133	0.36697	0	0	0.34565	0.442931
38	TRA:TGTGCTATGGAACGCGGAAGCAATGCAAAGCTAACCTTC_TRB:TGTGCCAGCAGTGATTGGACAGGGGGTAACACCTTGTACTTT	CD4_M2	14	4	7	16	28	56	25	Multifate	38	0.728551	0.263967	0	0	0.50199	0.350777
39	TRA:TGTGCAGCAAATTCTGGGACTTACCAGAGGTTT_TRB:TGTGCCAGCAGTGATGCACACAGGGATGGTGCAGAAACGCTGTATTTT	CD4_M2	1	2	21	8.33333	87.5	4.16667	24	TFH	39	0.395358	0.551249	0	1	0.223756	0.607802
40	TRA:TGTGCAGCAAGCTCTAACTATGCCCAGGGATTAACCTTC_TRB:TGTGCCAGCAGTGAGCTGGGGGGTAGTGCAGAAACGCTGTATTTT	CD4_M1	17	5	1	21.7391	4.34783	73.913	23	Th1	40	0.7018	0.230954	1	0	0.479652	0.32124
41	TRA:TGTGCAGCAAGTACT_TRB:TGTGCCTGGAGTTCGGGACTGAGCTCCTATGAACAGTACTTC	CD4_M1	15	0	8	0	34.7826	65.2174	23	Th1	41	0.767684	0.300151	1	0	0.534669	0.38315
42	TRA:TGTGCAGCAAGTTACAGCAACAACAGACTTACTTTG_TRB:TGTGCCAGCGGTGATACTGGGGGGGCGAGTGCAGAAACGCTGTATTTT	CD4_M1	12	8	3	34.7826	13.0435	52.1739	23	Multifate	42	0.637312	0.319136	0	0	0.425801	0.400135
43	TRA:TGTGCCTCATATGCAAACAAGATGATCTTT_TRB:TGTGCCTGGAGTTCCGGACTGAGCTCCTATGAACAGTACTTC	CD4_M1	6	8	7	38.0952	33.3333	28.5714	21	Multifate	43	0.534218	0.306364	0	0	0.339712	0.388708
44	TRA:TGTGCAGCAAGCATCGGGAATAACAGAATCTTCTTT_TRB:TGTGCCAGCGGTGACTGGGGGGGCGGGCAAGACACCCAGTACTTT	CD4_M2	4	7	10	33.3333	47.619	19.0476	21	Multifate	44	0.465217	0.401221	0	0	0.282092	0.473575
45	TRA:TGTGCAGCAAGTCCTGGAGGCAATAATAAGCTGACTTTT_TRB:TGTGCCTGGAGTTCGGGACTTAGCTCCTATGAACAGTACTTC	CD4_M1	6	3	11	15	55	30	20	Multifate	45	0.58632	0.372648	0	0	0.38322	0.448011
46	TRA:TGTGCTACTGAGGCGGACTACAGCAACAACAGACTTACTTTG_TRB:TGTGCCAGCGGCGACTGGGGGTCCCTCTATGAACAGTACTTC	CD4_M1	7	5	8	25	40	35	20	Multifate	46	0.525514	0.378984	0	0	0.332443	0.45368
47	TRA:TGTGCTCTGGGTGAGAACTATGGAAATGAGAAAATAACTTTT_TRB:TGTGCCTGGAGTCTCGCCGACGAAAGATTATTTTTC	CD4_M1	14	4	2	20	10	70	20	Th1	47	0.813028	0.208991	1	0	0.572534	0.30159
48	TRA:TGTGCAGCAAGCAAGAGCAACTATCAGTTGATCTGG_TRB:TGTGCTAGCAGTCCCGCCGGGACAGGGAGAGATGAACAGTACTTC	CD4_M2	12	2	6	10	30	60	20	Multifate	48	0.64817	0.298461	0	0	0.434868	0.381638
49	TRA:TGTGCAGCAAGCAAGGGGAATACAGGAAACTACAAATACGTCTTT_TRB:TGTGCCTGGAGTCTAGCCGACTCCGACTACACCTTC	CD4_M2	6	7	7	35	35	30	20	Multifate	49	0.602442	0.319965	0	0	0.396682	0.400877
50	TRA:TGTGCAGCAAGTTTTGGAGGCTATAAAGTGGTCTTT_TRB:TGTGCCAGCAGTTTCTGGGGGAGTGCAGAAACGCTGTATTTT	CD4_M2	14	2	4	10	20	70	20	Th1	50	0.788683	0.277079	1	0	0.552203	0.362508
51	TRA:TGTGCAGCCTATTACAACGTGCTTTACTTC_TRB:TGTGCCAGCAGCCTTTCTGGAAATACGCTCTATTTT	CD4_M2	3	6	11	30	55	15	20	Multifate	51	0.504143	0.385948	0	0	0.314597	0.459911
52	TRA:TGTGCAGCATCTGACACAAATGCTTACAAAGTCATCTTT_TRB:TGTGCCAGCAGTGATGCGGGGACAGCCAACGAAAGATTATTTTTC	CD4_M1	15	1	3	5.26316	15.7895	78.9474	19	Th1	52	0.789327	0.210328	1	0	0.552742	0.302787
53	TRA:TGTGCAGCAAGCTCTTCTGGCAGCTGGCAACTCATCTTT_TRB:TGTGCCAGCAGCTATCTCTGGGGGACTAGTGCAGAAACGCTGTATTTT	CD4_M1	5	4	9	22.2222	50	27.7778	18	Multifate	53	0.600538	0.404555	0	0	0.395092	0.476558
54	TRA:TGTGCAGCAAGCATGGATACAGAAGGTGCAGATAGACTCACCTTT_TRB:TGTGCCACCAGCCGGGACAGGGGTGGCACCCAGTACTTT	CD4_M2	14	2	2	11.1111	11.1111	77.7778	18	Th1	54	0.795602	0.328195	1	0	0.557982	0.40824
55	TRA:TGTGCAGCGAGCAATAACAACAATGCCCCACGATTT_TRB:TGTGCCTCCCGGGACTGGGGGGGAGACACCCAGTACTTT	CD4_M2	5	7	6	38.8889	33.3333	27.7778	18	Multifate	55	0.607639	0.38726	0	0	0.401022	0.461085
56	TRA:TGTGCAGCAAGTCGGAACTATGCCCAGGGATTAACCTTC_TRB:TGTGCCAGCAGTGATAGGGGACCCAACGAAAGATTATTTTTC	CD4_M1	1	6	10	35.2941	58.8235	5.88235	17	Multifate	56	0.433391	0.415611	0	0	0.255515	0.48645
57	TRA:TGTGCAGCAAGTGAGGGCACTGGGTCTAAGCTGTCATTT_TRB:TGTGCCTGGAGCCCCGACCCCAACGAAAGATTATTTTTC	CD4_M1	12	1	4	5.88235	23.5294	70.5882	17	Th1	57	0.690721	0.243596	1	0	0.4704	0.332551
58	TRA:TGTGCAGCAAGTGACACCAATACAGGCAAATTAACCTTT_TRB:TGTGCCAGCAGTGATATGGGGGGGGCGCGCTATGAACAGTACTTC	CD4_M2	10	3	4	17.6471	23.5294	58.8235	17	Multifate	58	0.703566	0.340476	0	0	0.481127	0.419227
59	TRA:TGTGCAGCAAGTGAGGGGAACAACAATGCCCCACGATTT_TRB:TGTGCCTGGAGTCCCCTTGAAACGCTGTATTTT	CD4_M2	8	6	3	35.2941	17.6471	47.0588	17	Multifate	59	0.652682	0.325029	0	0	0.438636	0.405408
60	TRA:TGTGCAGCAAGTGGCAGCTATGGAAATGAGAAAATAACTTTT_TRB:TGTGCCAGCAGGGAGGACTGGGGGGGCGGGAACTATGCTGAGCAGTTCTTC	CD4_M2	8	6	3	35.2941	17.6471	47.0588	17	Multifate	60	0.710909	0.273391	0	0	0.487258	0.359208
61	TRA:TGTGCTATGGAGAGAGGAAGCAATGCAAAGCTAACCTTC_TRB:TGTGCCAGCAGTGACTGGGCTAGTCAAAACACCTTGTACTTT	CD4_M1	15	0	1	0	6.25	93.75	16	Th1	61	0.860367	0.225346	1	0	0.612064	0.316223
62	TRA:TGTGCAGCAAGTGGGGGGCAGGGAGGCAGAGCTCTGATATTT_TRB:TGTGCCAGCGGTGAAACAGGGAGGGGCCAAGACACCCAGTACTTT	CD4_M1	10	3	2	20	13.3333	66.6667	15	Th1	62	0.805703	0.264512	1	0	0.566416	0.351264
63	TRA:TGTTATGGGAGCAGTGGCAACAAGCTCATCTTT_TRB:TGTGCCAGCAGTGACTACGGGAGAGGAAACGAAAGATTATTTTTC	CD4_M1	6	5	4	33.3333	26.6667	40	15	Multifate	63	0.506136	0.28463	0	0	0.316262	0.369264
64	TRA:TGTGCAGCAAATCAAGGAGGGTCTGCGAAGCTCATCTTT_TRB:TGTGCCTGGACCTCGGACAGTTCTGGAAATACGCTCTATTTT	CD4_M2	3	5	7	33.3333	46.6667	20	15	Multifate	64	0.482857	0.351415	0	0	0.296822	0.429015
65	TRA:TGTGCAGCGACGTCTAATTACAACGTGCTTTACTTC_TRB:TGTGCCAGCAGTGGACTGGGGGTTAGTCAAAACACCTTGTACTTT	CD4_M2	9	2	4	13.3333	26.6667	60	15	Multifate	65	0.768955	0.267109	0	0	0.53573	0.353587
66	TRA:TGTGCAGCAAGTATCGCCAATACCAACAAAGTCGTCTTT_TRB:TGTGCCAGCAGTGACGCCGGGACAGGGAACGAAAGATTATTTTTC	CD4_M1	5	2	7	14.2857	50	35.7143	14	Multifate	66	0.53198	0.33026	0	0	0.337843	0.410087
67	TRA:TGTGCAGCAATTTATGGGAGCAGTGGCAACAAGCTCATCTTT_TRB:TGTGCCTGGAGTTCGGACAGGGCGGGCCAAGACACCCAGTACTTT	CD4_M1	4	1	9	7.14286	64.2857	28.5714	14	Multifate	67	0.587168	0.427209	0	0	0.383928	0.496826
68	TRA:TGTGCTCTGAGTGAGAGGACTAACAGTGCAGGGAACAAGCTAACTTTT_TRB:TGTGCCTGGAGTACCCGGGACAGGGGGCATGCTGAGCAGTTCTTC	CD4_M1	11	2	1	14.2857	7.14286	78.5714	14	Th1	68	0.920464	0.223392	1	0	0.662249	0.314475
69	TRA:TGTGCAGCAGGGTCTAATTACAACGTGCTTTACTTC_TRB:TGTGCCAGCAGTGCCGGGACAGGGAACGAAAGATTATTTTTC	CD4_M2	6	3	5	21.4286	35.7143	42.8571	14	Multifate	69	0.635066	0.362541	0	0	0.423925	0.438969
70	TRA:TGTGCAGTCATGTCTAATTACAACGTGCTTTACTTC_TRB:TGTGCCTGGAGTCTAGCACGGGGGAGTGCTGAGCAGTTCTTC	CD4_M2	9	1	4	7.14286	28.5714	64.2857	14	Multifate	70	0.75183	0.269578	0	0	0.52143	0.355797
71	TRA:TGTGCACTGGGTAATGTTGGTGACAACAGTAAGCTGATTTGG_TRB:TGTGCCTGGAGTCTAGCAGACTCCGACTACACCTTC	CD4_M1	8	1	4	7.69231	30.7692	61.5385	13	Multifate	71	0.7671	0.231336	0	0	0.53418	0.321583
72	TRA:TGTGCAGCAAGCCCTGGCAGTGGTGGAAAACTCACTTTG_TRB:TGTGCCAGCAGTGACAGGAATGCTGAGCAGTTCTTC	CD4_M1	3	4	6	30.7692	46.1538	23.0769	13	Multifate	72	0.478277	0.325911	0	0	0.292998	0.406197
73	TRA:TGTGCAGCCGACATGTCTAATTACAACGTGCTTTACTTC_TRB:TGTGCCAGCAGTGAGGGCAGGGTTGAACAGTACTTC	CD4_M1	1	3	9	23.0769	69.2308	7.69231	13	TFH	73	0.461535	0.423185	0	1	0.279017	0.493225
74	TRA:TGTGCGTTTTCTGGAGGAAGCAATGCAAAGCTAACCTTC_TRB:TGTGCCTGGAGTCTTGACATCTCCAACGAAAGATTATTTTTC	CD4_M1	10	3	0	23.0769	0	76.9231	13	Th1	74	0.923544	0.1865	1	0	0.66482	0.281468
75	TRA:TGTATCCTGAGAGTAACAGGCAATACCGGAAAACTCATCTTT_TRB:TGTGCTAGCAGTTTGGCTGGGTTCACCGGGCAGCTCTACTTT	CD4_M2	4	3	6	23.0769	46.1538	30.7692	13	Multifate	75	0.504904	0.381927	0	0	0.315233	0.456313
76	TRA:TGTGCAGCAAGTGGGGACTATGGAAATGAGAAAATAACTTTT_TRB:TGTGCTAGCAGTCAGACTGGGGGGGCGGGAGCTGAGCAGTTCTTC	CD4_M2	3	5	5	38.4615	38.4615	23.0769	13	Multifate	76	0.528901	0.328688	0	0	0.335272	0.408682
77	TRA:TGTGCAGCAAGTTCTAATTACAACGTGCTTTACTTC_TRB:TGTGCCAGCAGTGATATGGGACAGGGCCAAGACACCCAGTACTTT	CD4_M1	7	0	5	0	41.6667	58.3333	12	Multifate	77	0.78109	0.337262	0	0	0.545864	0.416352
78	TRA:TGTGCAGCAAGTTGGAGTTACCAGAACTTCTATTTT_TRB:TGTGCCAGCAGTGATGGGACAGGAGCAAACACAGAAGTCTTCTTT	CD4_M2	6	3	3	25	25	50	12	Multifate	78	0.599335	0.375532	0	0	0.394088	0.450592
79	TRA:TGTGCAGCAAGTTGGAGTTACCAGAACTTCTATTTT_TRB:TGTGCCAGCAGTGCCGGGACTGGGGCAAACACCGGGCAGCTCTACTTT	CD4_M2	2	7	3	58.3333	25	16.6667	12	Multifate	79	0.592168	0.355851	0	0	0.388103	0.432983
80	TRA:TGTGCAGTGAGCATGGACACTGGAGCTAACACTGGAAAGCTCACGTTT_TRB:TGTGCCTGGAGTCTTCAGGACAATTCCTATGAACAGTACTTC	CD4_M2	5	5	2	41.6667	16.6667	41.6667	12	Multifate	80	0.701468	0.318039	0	0	0.479375	0.399154
81	TRA:TGTGCAGCAAGCGAAGCTACTGGAGGCAATAATAAGCTGACTTTT_TRB:TGTGCCAGCAGTCTAGGACTGGGGGGGCTTGAACAGTACTTC	CD4_M1	6	1	4	9.09091	36.3636	54.5455	11	Multifate	81	0.653025	0.321651	0	0	0.438922	0.402386
82	TRA:TGTGCAGCAAGTTATGGGAGCAGTGGCAACAAGCTCATCTTT_TRB:TGTGCCTGGGACAGGGGCCACGAAAGATTATTTTTC	CD4_M1	0	5	6	45.4545	54.5455	0	11	Multifate	82	0.474384	0.424955	0	0	0.289747	0.49481
83	TRA:TGCGCAGTCGACATGGGCTACAAACTTACCTTC_TRB:TGTGCCAGCGGTGATGCTGGGGGGGTTAACCAAGACACCCAGTACTTT	CD4_M2	3	6	2	54.5455	18.1818	27.2727	11	Multifate	83	0.528508	0.230525	0	0	0.334943	0.320857
84	TRA:TGTGCAGCAAGCATAGGCAATAACAGAATCTTCTTT_TRB:TGTGCCAGCGGTGATGTGGGACTGGGCCAAGACACCCAGTACTTT	CD4_M2	2	3	6	27.2727	54.5455	18.1818	11	Multifate	84	0.484997	0.394865	0	0	0.298609	0.467888
85	TRA:TGTGCAGCAAGCCTCATAACAGGCAATACCGGAAAACTCATCTTT_TRB:TGTGCCTGGAGTCTAGTTGACACCCAGTACTTT	CD4_M1	4	2	4	20	40	40	10	Multifate	85	0.606271	0.274566	0	0	0.39988	0.360259
86	TRA:TGTGCAGCAAGTGGAGGGACT_TRB:TGTGCCTGGACTGGGGGGACAGACACCCAGTACTTT	CD4_M1	0	3	7	30	70	0	10	TFH	86	0.432953	0.425092	0	1	0.25515	0.494932
87	TRA:TGTGCTGTGAGCGCGAATAGCAATAACAGAATCTTCTTT_TRB:TGTGCCAGCGGTGATGCTGGGGGGGTCGGACAAGACACCCAGTACTTT	CD4_M1	7	2	1	20	10	70	10	Th1	87	0.712742	0.301549	1	0	0.488789	0.384401
88	TRA:TGTGCAGCAAATAGCAACTATCAGTTGATCTGG_TRB:TGTGCCTGGAGTCTAATGGCAGAGTATAATTCGCCCCTCTACTTT	CD4_M2	4	1	5	10	50	40	10	Multifate	88	0.67827	0.381377	0	0	0.460003	0.455821
89	TRA:TGTGCAGCAAGAGAAGGAAGCAATGCAAAGCTAACCTTC_TRB:TGTGCCAGCGGTGATGCGGGGACTGGTCAAGACACCCAGTACTTT	CD4_M2	4	2	4	20	40	40	10	Multifate	89	0.652335	0.391554	0	0	0.438346	0.464926
90	TRA:TGTGCAGCAAGCATTGGCAATAACAGAATCTTCTTT_TRB:TGTGCCAGCGGTGATGTTGGGGGGGGGCAAGACACCCAGTACTTT	CD4_M2	4	2	4	20	40	40	10	Multifate	90	0.497876	0.275979	0	0	0.309364	0.361524
91	TRA:TGTGCAGCAAGGACGGGTTACCAGAACTTCTATTTT_TRB:TGTGCCTGGAGTCTACCTGGTAACCAAGACACCCAGTACTTT	CD4_M2	8	0	2	0	20	80	10	Th1	91	0.911027	0.216147	1	0	0.654368	0.307993
92	TRA:TGTGCAGCAGCGGGTGGGTCTAATTACAACGTGCTTTACTTC_TRB:TGTGCCTGGAGTCTAGTTGGGACAGCAAACTCCGACTACACCTTC	CD4_M2	3	4	3	40	30	30	10	Multifate	92	0.536259	0.306512	0	0	0.341416	0.388841
93	TRA:TGTGCTCTGAGAGGGTATAACCAGGGGAAGCTTATCTTT_TRB:TGTGCCAGCAGCCTTTCTGGAAATACGCTCTATTTT	CD4_M2	1	1	8	10	80	10	10	TFH	93	0.402601	0.374798	0	1	0.229804	0.449934
94	TRA:TGTGCAGGGGATACTGGAGGACTAAGTGGTAAATTAACATTC_TRB:TGTGCCTGGAGTCTGGGGGACGAAAGATTATTTTTC	CD4_M1	5	3	1	33.3333	11.1111	55.5556	9	Multifate	94	0.660017	0.315055	0	0	0.444761	0.396484
95	TRA:TGTGCAGTGAGTCTATCTGGTAGCTTCAATAAGTTGACCTTT_TRB:TGTGCTAGCAGTTCGGCAGGGAAAGACACCCAGTACTTT	CD4_M2	7	1	1	11.1111	11.1111	77.7778	9	Th1	95	0.762883	0.293277	1	0	0.530659	0.376999
96	TRA:TGTGCTCTGAGCATGGGCTACAAACTTACCTTC_TRB:TGTGCCAGCGGTGACACTGGGGGGGCTAGTGCAGAAACGCTGTATTTT	CD4_M2	4	4	1	44.4444	11.1111	44.4444	9	Multifate	96	0.694577	0.175724	0	0	0.47362	0.271827
97	TRA:TGTGCAGCAAGCATAGGCAATAACAGAATCTTCTTT_TRB:TGTGCCAGCGGTGAGCCCGGGACAGGACAAGACACCCAGTACTTT	CD4_M1	4	0	4	0	50	50	8	Multifate	97	0.636007	0.284759	0	0	0.424711	0.369379
98	TRA:TGTGCAGCAAGCATTGGCACCAATACAGGCAAATTAACCTTT_TRB:TGTGCCAGCAGTCGAACCAACGAAAGATTATTTTTC	CD4_M1	3	4	1	50	12.5	37.5	8	Multifate	98	0.620642	0.20415	0	0	0.411881	0.297259
99	TRA:TGTGCAGCAAGCCCTCTGGGCAATTACAACGTGCTTTACTTC_TRB:TGTGCCAGCGGTGACAGGGGAGGCCAAGACACCCAGTACTTT	CD4_M1	4	2	2	25	25	50	8	Multifate	99	0.620239	0.251561	0	0	0.411544	0.339677
100	TRA:TGTGCAGCAAGTGACACCAATACAGGCAAATTAACCTTT_TRB:TGTGCCTGGAGCCTCGGGACCAACGAAAGATTATTTTTC	CD4_M1	3	1	4	12.5	50	37.5	8	Multifate	100	0.584647	0.40663	0	0	0.381823	0.478414
101	TRA:TGTGCAGCAAGTGGGAACAACAATGCCCCACGATTT_TRB:TGTGCCAGCAGTGACCTACAAGACACCCAGTACTTT	CD4_M1	4	4	0	50	0	50	8	Multifate	101	0.728804	0.218555	0	0	0.502201	0.310147
102	TRA:TGTGCAGCAAGTTATGGGAGCAGTGGCAACAAGCTCATCTTT_TRB:TGTGCCTGGAGTCCGACTGGGGGCCAAGACACCCAGTACTTT	CD4_M1	5	0	3	0	37.5	62.5	8	Multifate	102	0.752902	0.276865	0	0	0.522325	0.362316
103	TRA:TGTGCAGCAAGTTTTAGCAACTATCAGTTGATCTGG_TRB:TGTGCCAGCAGTTTCCCGGACTGGGGGGATGAACAGTACTTC	CD4_M1	6	1	1	12.5	12.5	75	8	Th1	103	0.889354	0.169551	1	0	0.636269	0.266305
104	TRA:TGTGTTCTGGAGGAGGAGAACATGGGCTACAAACTTACCTTC_TRB:TGTGCCAGCAGTCGGGACTGGGGGTATGCTGAGCAGTTCTTC	CD4_M1	7	0	1	0	12.5	87.5	8	Th1	104	0.853842	0.234175	1	0	0.606615	0.324122
105	TRA:TGTGCAGCAAGCAACAATTACAACGTGCTTTACTTC_TRB:TGTGCCAGCAGTGATGGGACAGGGGGAAACACAGAAGTCTTCTTT	CD4_M2	8	0	0	0	0	100	8	Th1	105	1.04538	0.119337	1	0	0.766559	0.221379
106	TRA:TGTGCAGCAAGCATTGGCAATAACAGAATCTTCTTT_TRB:TGTGCCAGCGGTGATGCAGGGACAGGGAACGAAAGATTATTTTTC	CD4_M2	3	1	4	12.5	50	37.5	8	Multifate	106	0.507331	0.363755	0	0	0.317259	0.440055
107	TRA:TGTGCAGCAAGCCTTCTTTCCAATACCAACAAAGTCGTCTTT_TRB:TGTGCCAGCAGTGATAGGGGGGGCCAAGACACCCAGTACTTT	CD4_M2	2	2	4	25	50	25	8	Multifate	107	0.389801	0.437063	0	0	0.219116	0.505642
108	TRA:TGTGCAGCAAGTGCTGACTATGCCCAGGGATTAACCTTC_TRB:TGTGCCAGCAGTGACCAGAACTATGCTGAGCAGTTCTTC	CD4_M2	8	0	0	0	0	100	8	Th1	108	0.765578	0.215413	1	0	0.53291	0.307337
109	TRA:TGTGCAGCAGGGGCTAATTACAACGTGCTTTACTTC_TRB:TGTGCCAGCAGTGAGGGGACTGGGGGGGATGAACAGTACTTC	CD4_M2	1	2	5	25	62.5	12.5	8	Multifate	109	0.483089	0.443031	0	0	0.297016	0.510981
110	TRA:TGTGCTCTGAGCACAGGGAACAAGCTAACTTTT_TRB:TGTGCCAGCGGTGATTTTGGGGGCCTTAACCAAGACACCCAGTACTTT	CD4_M2	4	2	2	25	25	50	8	Multifate	110	0.670397	0.272707	0	0	0.453429	0.358596
111	TRA:TGTGCTGCAAGTGCCAATACAGGCAAATTAACCTTT_TRB:TGTGCCAGCGGTGATGCACAAACAGAAGTCTTCTTT	CD4_M2	4	1	3	12.5	37.5	50	8	Multifate	111	0.657653	0.298553	0	0	0.442787	0.38172
112	TRA:TGTGCAGCAAGCATCGGCAATAACAGAATCTTCTTT_TRB:TGTGCCAGCGGTGAGCCCGGGACTGGGAAAGACACCCAGTACTTT	CD4_M1	3	0	4	0	57.1429	42.8571	7	Multifate	112	0.422159	0.397153	0	0	0.246136	0.469935
113	TRA:TGTGCAGCAAGGGGGGACTCGGGATACAACAAACTCACTTTT_TRB:TGTGCCTGGACAGGGTTCAACGAAAGATTATTTTTC	CD4_M1	4	0	3	0	42.8571	57.1429	7	Multifate	113	0.631942	0.26871	0	0	0.421316	0.35502
114	TRA:TGTGCAGCAAGTGGGAACAACAATGCCCCACGATTT_TRB:TGTGCCAGCAGTACTTTCCAAGACACCCAGTACTTT	CD4_M1	1	2	4	28.5714	57.1429	14.2857	7	Multifate	114	0.389364	0.331142	0	0	0.218751	0.410877
115	TRA:TGTGCAGCAAGTTACGGCCAGGGGAAGCTTATCTTT_TRB:TGTGCCAGCGGTGACCCGACTGGGGGGCAAGACACCCAGTACTTT	CD4_M1	0	1	6	14.2857	85.7143	0	7	TFH	115	0.396801	0.405611	0	1	0.224961	0.477503
116	TRA:TGTGCAGCATACCATAACTATGCCCAGGGATTAACCTTC_TRB:TGTGCCAGCAGTGATGCGGGGGGCGGGGGTCAAAACACCTTGTACTTT	CD4_M1	3	3	1	42.8571	14.2857	42.8571	7	Multifate	116	0.653481	0.271091	0	0	0.439303	0.35715
117	TRA:TGTGCTATGGAACGAGGAAGCAATGCAAAGCTAACCTTC_TRB:TGTGCCAGCAGTGACTGGGGGAGTCAAAACACCTTGTACTTT	CD4_M1	7	0	0	0	0	100	7	Th1	117	0.906386	0.233386	1	0	0.650492	0.323417
118	TRA:TGTGCTGCTGAGGCAGGTGCAGGGAACAAGCTAACTTTT_TRB:TGTGCCAGCGGTGATGCTTCAAACTCCGACTACACCTTC	CD4_M1	4	1	2	14.2857	28.5714	57.1429	7	Multifate	118	0.797011	0.258114	0	0	0.559158	0.34554
119	TRA:TGTGCTGTGAGCATGAATTATAACCAGGGGAAGCTTATCTTT_TRB:TGTGCCAGCAGTGAGGGCAGGGTTGAACAGTACTTC	CD4_M1	1	1	5	14.2857	71.4286	14.2857	7	TFH	119	0.3831	0.300103	0	1	0.21352	0.383107
120	TRA:TGTGCAGCAAATAGCAACTATCAGTTGATCTGG_TRB:TGTGCCAGCAGCCAAGAAAGTCCCCGACAGTGCCAGGCTCCGCTTTTT	CD4_M2	3	3	1	42.8571	14.2857	42.8571	7	Multifate	120	0.571921	0.257621	0	0	0.371195	0.345099
121	TRA:TGTGCAGCAAGTCCCGGAAACTACAAATACGTCTTT_TRB:TGTGCTAGCAGTTTGGCTGGGTTCACCGGGCAGCTCTACTTT	CD4_M2	1	2	4	28.5714	57.1429	14.2857	7	Multifate	121	0.553815	0.445212	0	0	0.356076	0.512933
122	TRA:TGTGCAGCAAGTTGGGGGACTGGAGGCTATAAAGTGGTCTTT_TRB:TGTGCTAGCAGTTCGGCAGGGAAAGACACCCAGTACTTT	CD4_M2	2	2	3	28.5714	42.8571	28.5714	7	Multifate	122	0.550213	0.344586	0	0	0.353068	0.422905
123	TRA:TGTGCTCTGAGTGACTCGGGATACAACAAACTCACTTTT_TRB:TGTGCCAGCGGTGATGCTGGGGGGCCTAGTGCAGAAACGCTGTATTTT	CD4_M2	4	0	3	0	42.8571	57.1429	7	Multifate	123	0.57375	0.288329	0	0	0.372723	0.372573
124	TRA:TGTGCTCTGGGTCCGTCTAATTACAACGTGCTTTACTTC_TRB:TGTGCCTGGCTACCGGGACAGACAAACACCGGGCAGCTCTACTTT	CD4_M2	4	3	0	42.8571	0	57.1429	7	Multifate	124	0.790833	0.233007	0	0	0.553999	0.323077
125	TRA:TGTGCTCTGGGTGACCATAGCAACTATCAGTTGATCTGG_TRB:TGTGCCAGCAGCGAAGGGACAGTCTATGAACAGTACTTC	CD4_M2	3	2	2	28.5714	28.5714	42.8571	7	Multifate	125	0.591913	0.406406	0	0	0.38789	0.478214
126	TRA:TGTGCTGCAAGTGCAGACAGTGCAGGGAACAAGCTAACTTTT_TRB:TGTGCCAGCGGTGATGCAGGGACAGGGAACGAAAGATTATTTTTC	CD4_M2	5	0	2	0	28.5714	71.4286	7	Th1	126	0.661934	0.326985	1	0	0.446362	0.407158
127	TRA:TGCTACTGAGGAGGTGCAGATAGACTCACCTTT_TRB:TGTGCCTGGAGTCTTGACATCTCCAACGAAAGATTATTTTTC	CD4_M1	2	3	1	50	16.6667	33.3333	6	Multifate	127	0.721195	0.202606	0	0	0.495848	0.295878
128	TRA:TGTGCAGCAACAGACACAAATGCTTACAAAGTCATCTTT_TRB:TGTGCCAGCGGTGAACCCGGGACAGCCAACGAAAGATTATTTTTC	CD4_M1	0	1	5	16.6667	83.3333	0	6	TFH	128	0.372962	0.440217	0	1	0.205054	0.508464
129	TRA:TGTGCAGCAAGTGACACCAATACAGGCAAATTAACCTTT_TRB:TGTGCCTGGAGGGACTGGGGGGTCCAAGACACCCAGTACTTT	CD4_M1	3	1	2	16.6667	33.3333	50	6	Multifate	129	0.688523	0.344634	0	0	0.468565	0.422948
130	TRA:TGTGCAGCACGCTACAGCAACAACAGACTTACTTTG_TRB:TGTGCCAGCAGTGATGAGGGGACAGGGAACACCGGGCAGCTCTACTTT	CD4_M1	4	0	2	0	33.3333	66.6667	6	Th1	130	0.665526	0.302172	1	0	0.449361	0.384958
131	TRA:TGTGCAGCAGAATATAACAACAATGCCCCACGATTT_TRB:TGTGCCTGGAGTTCGGGACTTAGCTCCTATGAACAGTACTTC	CD4_M1	5	0	1	0	16.6667	83.3333	6	Th1	131	0.787145	0.22072	1	0	0.55092	0.312085
132	TRA:TGTGCAGCAAGCACCGATAACACCAATACAGGCAAATTAACCTTT_TRB:TGTGCTAGCAGTGCCCCGGGACTGGGGGGAGATGAACAGTACTTC	CD4_M2	2	1	3	16.6667	50	33.3333	6	Multifate	132	0.586373	0.37485	0	0	0.383264	0.449981
133	TRA:TGTGCAGCAAGCATTGGCAATAACAGAATCTTCTTT_TRB:TGTGCCAGCGGTGAAACCGGGACAGGCCAAGACACCCAGTACTTT	CD4_M2	1	2	3	33.3333	50	16.6667	6	Multifate	133	0.486597	0.384686	0	0	0.299945	0.458782
134	TRA:TGTGCAGCAAGTGGAAACAGTGCAGGGAACAAGCTAACTTTT_TRB:TGTGCCAGCAGTGATTTTGGGACTGGGCAAGACACCCAGTACTTT	CD4_M2	3	2	1	33.3333	16.6667	50	6	Multifate	134	0.639018	0.418588	0	0	0.427226	0.489113
135	TRA:TGTGCTCTGAGTGATCGGGGGGGAAATGAGAAAATAACTTTT_TRB:TGTGCCAGCGGTGATCTGGGGGGGCGGCACCAAGACACCCAGTACTTT	CD4_M2	2	2	2	33.3333	33.3333	33.3333	6	Multifate	135	0.553274	0.455926	0	0	0.355625	0.522518
136	TRA:TGTGCAGCAACCTTTAATTACAACGTGCTTTACTTC_TRB:TGTGCCAGCGGTGAGAGCTCCTATGAACAGTACTTC	CD4_M1	3	0	2	0	40	60	5	Multifate	136	0.63129	0.298174	0	0	0.420772	0.381381
137	TRA:TGTGCAGCAAGTGACACCAATACAGGCAAATTAACCTTT_TRB:TGTGCCAGCGGCGACTGGGGGTCCCTCTATGAACAGTACTTC	CD4_M1	4	1	0	20	0	80	5	Th1	137	0.891095	0.210805	1	0	0.637724	0.303214
138	TRA:TGTGCAGCAAGTGCCGGTACAGGAAACTACAAATACGTCTTT_TRB:TGTGCCAGCGGTGATGTAGGGGACGGTCAAGACACCCAGTACTTT	CD4_M1	4	1	0	20	0	80	5	Th1	138	0.80217	0.247865	1	0	0.563466	0.336371
139	TRA:TGTGCAGCAAGTTATGGGAGCAGTGGCAACAAGCTCATCTTT_TRB:TGTGCCTGGGGGGACAGGGAAGACACCCAGTACTTT	CD4_M1	3	0	2	0	40	60	5	Multifate	139	0.695807	0.247894	0	0	0.474647	0.336396
140	TRA:TGTGCAGTATCTTATGGGAGCAGTGGCAACAAGCTCATCTTT_TRB:TGTGCCTGGAGTCCCACGGGGGGCCAAGACACCCAGTACTTT	CD4_M1	3	0	2	0	40	60	5	Multifate	140	0.636123	0.374938	0	0	0.424808	0.45006
141	TRA:TGTGCAGTTCTTAATACAGGAAACTACAAATACGTCTTT_TRB:TGTGCCAGCGGTGAGCCCGGGACAGGACAAGACACCCAGTACTTT	CD4_M1	0	0	5	0	100	0	5	TFH	141	0.305311	0.609529	0	1	0.148562	0.659944
142	TRA:TGTGCTATGTCCAATACCAACAAAGTCGTCTTT_TRB:TGTGCCAGCTCTCTTGTAGAAACGCTGTATTTT	CD4_M1	1	1	3	20	60	20	5	Multifate	142	0.445248	0.405414	0	0	0.265417	0.477326
143	TRA:TGCGCAGTCAGCCATTCTGGAGGAAGCAATGCAAAGCTAACCTTC_TRB:TGTGCCTGGAGTCTTAACTGGGGTGCTGAGCAGTTCTTC	CD4_M2	5	0	0	0	0	100	5	Th1	143	0.736595	0.23939	1	0	0.508708	0.328788
144	TRA:TGTGCAGCAAACTACAGCAACAACAGACTTACTTTG_TRB:TGTGCCAGCAGTGACTTCGGGGGGCCTAGTGCAGAAACGCTGTATTTT	CD4_M2	3	1	1	20	20	60	5	Multifate	144	0.590713	0.242485	0	0	0.386888	0.331557
145	TRA:TGTGCAGCAAATAGCAACTATCAGTTGATCTGG_TRB:TGTGCCTGGAGTCAACACTGGGGGCAAGACACCCAGTACTTT	CD4_M2	1	0	4	0	80	20	5	TFH	145	0.430612	0.513499	0	1	0.253195	0.574028
146	TRA:TGTGCAGCAAGTGACACCAATACAGGCAAATTAACCTTT_TRB:TGTGCCTGGAGTCTGTATAACTCCGACTACACCTTC	CD4_M2	1	0	4	0	80	20	5	TFH	146	0.443598	0.447109	0	1	0.264039	0.51463
147	TRA:TGTGCAGCAAGTGCAGGGACAGGCAATACCGGAAAACTCATCTTT_TRB:TGTGCCTGGAGTCTTCAGGACAATTCCTATGAACAGTACTTC	CD4_M2	3	0	2	0	40	60	5	Multifate	147	0.63305	0.30215	0	0	0.422242	0.384938
148	TRA:TGTGCAGCAAGTGCCAATTACAACGTGCTTTACTTC_TRB:TGTGCCAGCAGTGATGGGACAGGGGCCAACCAGGCTCCGCTTTTT	CD4_M2	0	1	4	20	80	0	5	TFH	148	0.453772	0.441978	0	1	0.272535	0.510039
149	TRA:TGTGCAGCATCCTCCTCCTTCAGCAAGCTGGTGTTT_TRB:TGTGCCAGCAGTGACAGGGGGGCAGAAGTCTTCTTT	CD4_M2	4	1	0	20	0	80	5	Th1	149	0.795399	0.264936	1	0	0.557812	0.351643
150	TRA:TGTGCAGTGACCGGTACAGGAAACTACAAATACGTCTTT_TRB:TGTGCCAGCAGTGATTTTGGGACTGGGCAAGACACCCAGTACTTT	CD4_M2	1	1	3	20	60	20	5	Multifate	150	0.460181	0.377092	0	0	0.277887	0.451988
151	TRA:TGTGCTCTGGGGGCATCTTCTGGCAGCTGGCAACTCATCTTT_TRB:TGTGCCAGCGGTGATCCGACTGGGACAAACACCGGGCAGCTCTACTTT	CD4_M2	2	0	3	0	60	40	5	Multifate	151	0.521443	0.424217	0	0	0.329044	0.494149
152	TRA:TGCTCAGCAAGGTCAAATAACTATGCCCAGGGATTAACCTTC_TRB:TGTGCCAGCAGTATTGGGGGAGACACCCAGTACTTT	CD4_M1	1	2	1	50	25	25	4	Multifate	152	0.700142	0.290388	0	0	0.478267	0.374415
153	TRA:TGCTCAGCAGACACAAATGCTTACAAAGTCATCTTT_TRB:TGTGCCAGCAGTAGGGAAGAAGTCTTCTTT	CD4_M1	4	0	0	0	0	100	4	Th1	153	0.868382	0.23466	1	0	0.618757	0.324556
154	TRA:TGCTGGATGACACTGCCACCTACATCTGTGTGGTGGGCGAAAGACACCAATACAGGCAAATTAACCTTT_TRB:TGTGCCTGGAGCCCAATCTCCGACTACACCTTC	CD4_M1	3	0	1	0	25	75	4	Th1	154	0.618853	0.244996	1	0	0.410387	0.333804
155	TRA:TGTGCAGCAAATTATGGGAGCAGTGGCAACAAGCTCATCTTT_TRB:TGTGCCAGCGGTGAGCCCGGGACAGGACAAGACACCCAGTACTTT	CD4_M1	3	1	0	25	0	75	4	Th1	155	0.674302	0.168997	1	0	0.456689	0.265809
156	TRA:TGTGCAGCAAGCATAAGGAATAGCAATAACAGAATCTTCTTT_TRB:TGTGCCAGCAAGGATGCAAACTCCGACTACACCTTC	CD4_M1	1	3	0	75	0	25	4	Slamf6Hi_CD4	156	0.578331	0.256333	0	0	0.376548	0.343946
157	TRA:TGTGCAGCAAGCCAACCAGGCACTGGGAGTAACAGGCTCACTTTT_TRB:TGTGCCAGCAGTGGGGGGGAGGACACCGGGCAGCTCTACTTT	CD4_M1	4	0	0	0	0	100	4	Th1	157	0.872607	0.106039	1	0	0.622285	0.209482
158	TRA:TGTGCAGCAAGTAACACCAATACAGGCAAATTAACCTTT_TRB:TGTGCCAGCAGCCCTAGCCCGGGACAAAAAAACACCTTGTACTTT	CD4_M1	2	0	2	0	50	50	4	Multifate	158	0.71002	0.390411	0	0	0.486516	0.463903
159	TRA:TGTGCAGCAAGTCATAACTATGCCCAGGGATTAACCTTC_TRB:TGTGCCAGCAGTGGGGGACCGGCAAACTCCGACTACACCTTC	CD4_M1	3	1	0	25	0	75	4	Th1	159	0.900449	0.110352	1	0	0.645534	0.21334
160	TRA:TGTGCAGCAAGTGACACCAATACAGGCAAATTAACCTTT_TRB:TGTGCCAGCAGTGATCACAATTCTGGAAATACGCTCTATTTT	CD4_M1	2	0	2	0	50	50	4	Multifate	160	0.572489	0.271529	0	0	0.37167	0.357542
161	TRA:TGTGCAGCAAGTGACACCAATACAGGCAAATTAACCTTT_TRB:TGTGCCTGGAGCCCAATCTCCGACTACACCTTC	CD4_M1	1	0	3	0	75	25	4	TFH	161	0.531977	0.383396	0	1	0.337841	0.457627
162	TRA:TGTGCAGCAAGTGACACCAATACAGGCAAATTAACCTTT_TRB:TGTGCCTGGAGTCAGGCAGCTGAGCAGTTCTTC	CD4_M1	1	1	2	25	50	25	4	Multifate	162	0.67663	0.343296	0	0	0.458633	0.42175
163	TRA:TGTGCAGCAAGTGGAGGCAATACCGGAAAACTCATCTTT_TRB:TGTGCCAGCGGTGATGCGGGGGGGGTTGGCCAAGACACCCAGTACTTT	CD4_M1	1	2	1	50	25	25	4	Multifate	163	0.479611	0.178664	0	0	0.294112	0.274457
164	TRA:TGTGCAGCAAGTTATAACTATGCCCAGGGATTAACCTTC_TRB:TGTGCCAGCAGGGAAACAGGGAGGGCCAACGAAAGATTATTTTTC	CD4_M1	3	0	1	0	25	75	4	Th1	164	0.736606	0.259164	1	0	0.508717	0.34648
165	TRA:TGTGCAGCGCTTTATGGGAGCAGTGGCAACAAGCTCATCTTT_TRB:TGTGCCTGGAGTCTCACTGGGGGCCAAGACACCCAGTACTTT	CD4_M1	2	0	2	0	50	50	4	Multifate	165	0.798083	0.229184	0	0	0.560053	0.319657
166	TRA:TGTGCAGGGGATACTGGAGGACTAAGTGGTAAATTAACATTC_TRB:TGTGCCTGGAGTCTCGCCGACGAAAGATTATTTTTC	CD4_M1	2	0	2	0	50	50	4	Multifate	166	0.711854	0.311653	0	0	0.488047	0.393441
167	TRA:TGTGCGGCCAACTATGGAAATGAGAAAATAACTTTT_TRB:TGTGCTAGCAGTCCTCTGGGACTGGGGGAAAACACCTTGTACTTT	CD4_M1	0	1	3	25	75	0	4	TFH	167	0.52149	0.313188	0	1	0.329083	0.394814
168	TRA:TGTGCTATGGAGCAGGGAGGCAGAGCTCTGATATTT_TRB:TGTGCCAGCAGCCCGCGACTGGACTATGCTGAGCAGTTCTTC	CD4_M1	3	0	1	0	25	75	4	Th1	168	0.612144	0.252901	1	0	0.404784	0.340876
169	TRA:TGTGCTCTGAGTGCCCTCATGAATTATGGGAGCAGTGGCAACAAGCTCATCTTT_TRB:TGTGCCAGCGGTGATGCGGGGGGGGTTGGCCAAGACACCCAGTACTTT	CD4_M1	2	1	1	25	25	50	4	Multifate	169	0.648306	0.262756	0	0	0.434981	0.349693
170	TRA:TGTGCTCTGGGTGAGAACTATGGAAATGAGAAAATAACTTTT_TRB:TGTGCCTGGAGTTCGGGACTTAGCTCCTATGAACAGTACTTC	CD4_M1	1	1	2	25	50	25	4	Multifate	170	0.594619	0.251512	0	0	0.39015	0.339633
171	TRA:TGTGCACTGGGTAATGTTGGTGACAACAGTAAGCTGATTTGG_TRB:TGTGCCTGGAGTCTTCAGGACAATTCCTATGAACAGTACTTC	CD4_M2	2	0	2	0	50	50	4	Multifate	171	0.586406	0.399237	0	0	0.383291	0.4718
172	TRA:TGTGCAGCAAGTATGAATTATAACCAGGGGAAGCTTATCTTT_TRB:TGTGCCTGGAGTCTAGCCGACTCCGACTACACCTTC	CD4_M2	1	2	1	50	25	25	4	Multifate	172	0.557194	0.431206	0	0	0.358898	0.500402
173	TRA:TGTGCAGCAAGTGGCGGAGGCAATAATAAGCTGACTTTT_TRB:TGTGCCTGGAGTCCCACGGGGGGCCAAGACACCCAGTACTTT	CD4_M2	3	0	1	0	25	75	4	Th1	173	0.889943	0.2657	1	0	0.636761	0.352327
174	TRA:TGTGCAGCAAGTTATAACTATGCCCAGGGATTAACCTTC_TRB:TGTGCCTCCTCACTGGGGGCCCAAGACACCCAGTACTTT	CD4_M2	0	3	1	75	25	0	4	Slamf6Hi_CD4	174	0.355277	0.333997	0	0	0.190286	0.413431
175	TRA:TGTGCAGCAAGTTCGGGGAACAACAATGCCCCACGATTT_TRB:TGTGCCAGCAGTGGACAGAACGAAAGATTATTTTTC	CD4_M2	1	0	3	0	75	25	4	TFH	175	0.515687	0.237112	0	1	0.324237	0.32675
176	TRA:TGTGCAGCCCACTACAGCAACAACAGACTTACTTTG_TRB:TGTGCCAGCGGTGATTTTGGGGGGGGCCAAGACACCCAGTACTTT	CD4_M2	2	1	1	25	25	50	4	Multifate	176	0.88774	0.248803	0	0	0.634922	0.337209
	Legend: Table showing the clonal distribution of 176 CD4 T cell clones (with four or more cells per clone from two individual mice infected with LCMV Cl13). To statistically test whether some clones display a biased cell-fate decision, we performed an analysis using clones that have at least 4 cells (n=176 clones). Briefly, Th1 or Tfh biased clones were identified if 65% of the cells in that clon…
