# Supplementary figures and images for: Delineating the transcriptional landscape and clonal diversity of virus-specific CD4+ T cells during chronic viral infection
Source: eLife journal article supplement (doi:10.7554/elife.80079), 2022-10-18

Figure 1-Figure Supplement 1

**A**

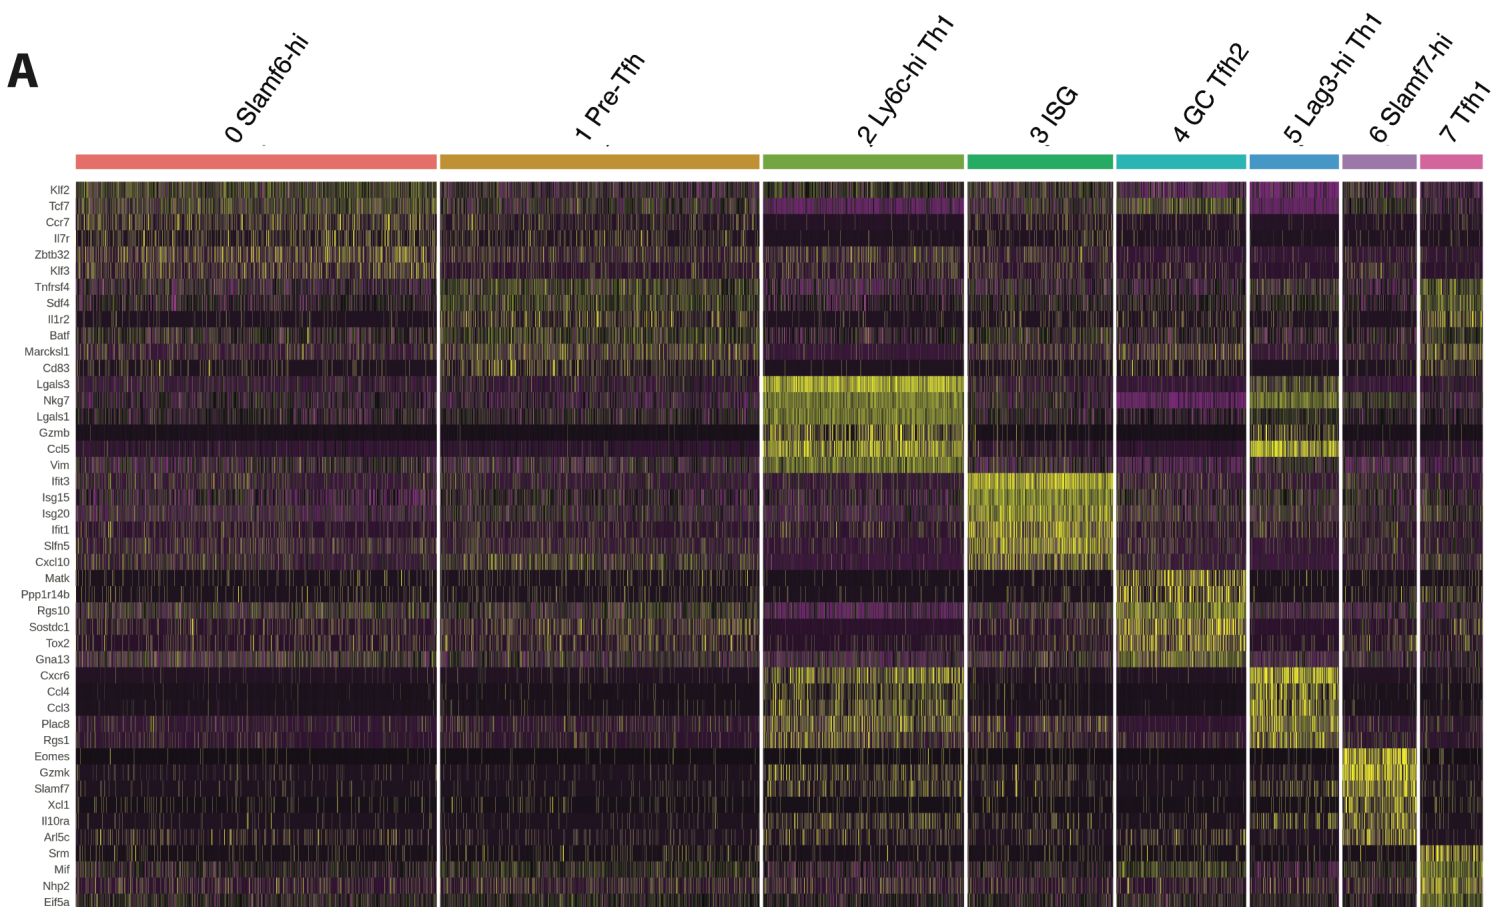

**B**

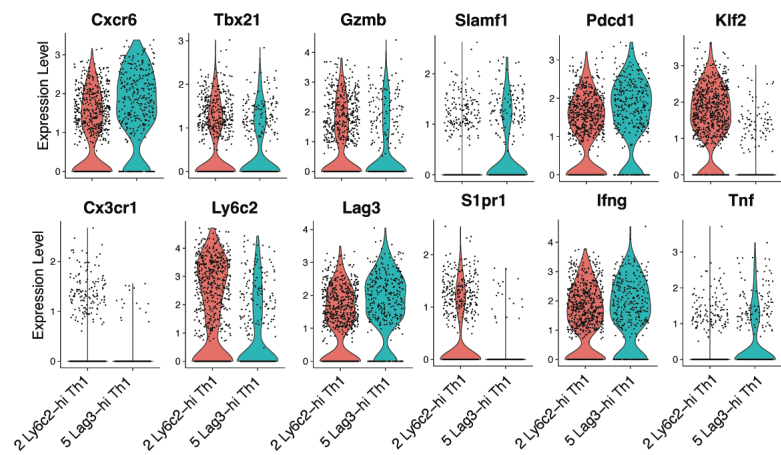

**C**

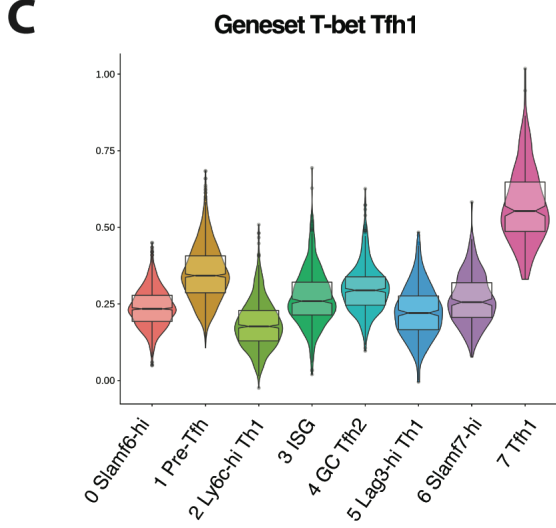

**D**

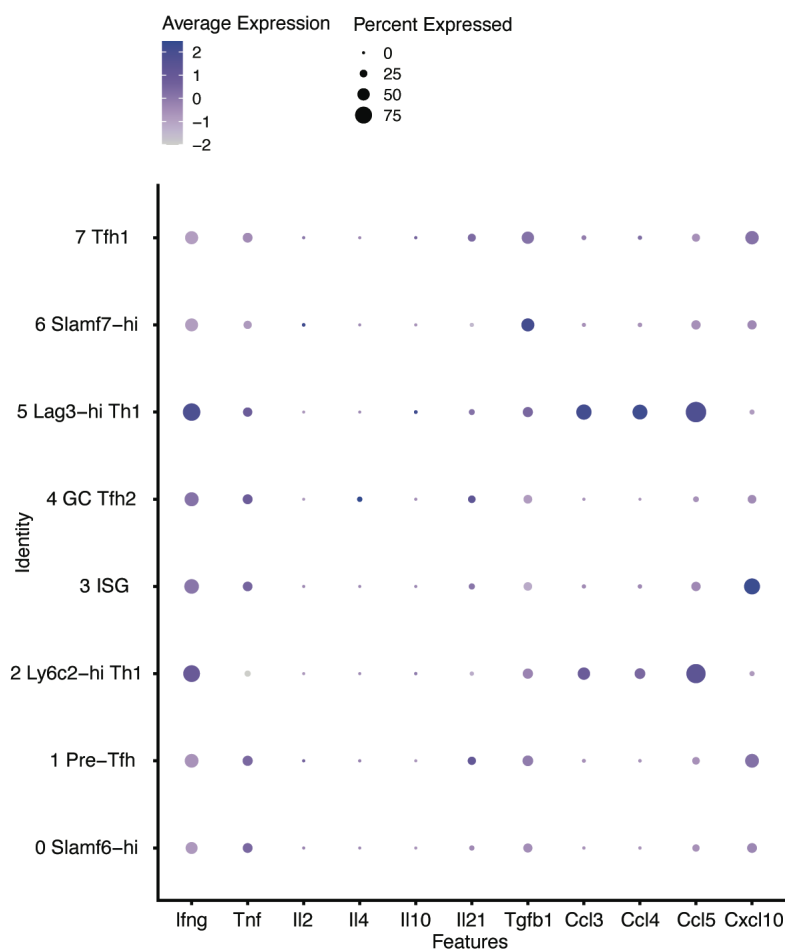

Supplement: supp [file elife_poa_e80079_Figure_1_figure_supplement_1.pdf › elife_poa_e80079_Figure_1_figure_supplement_1.pdf]

**A**

Distribution and frequency of 176 clones (with four or more cells per clone)

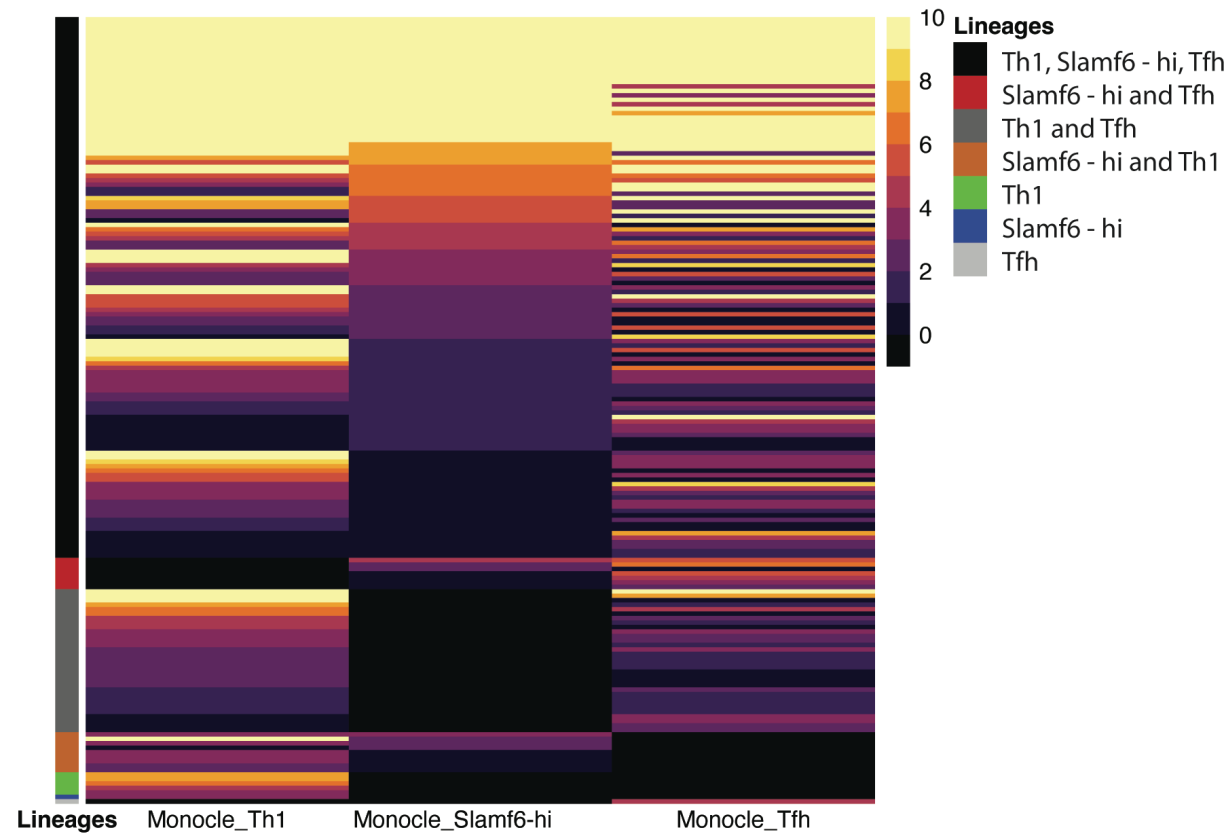

**B**

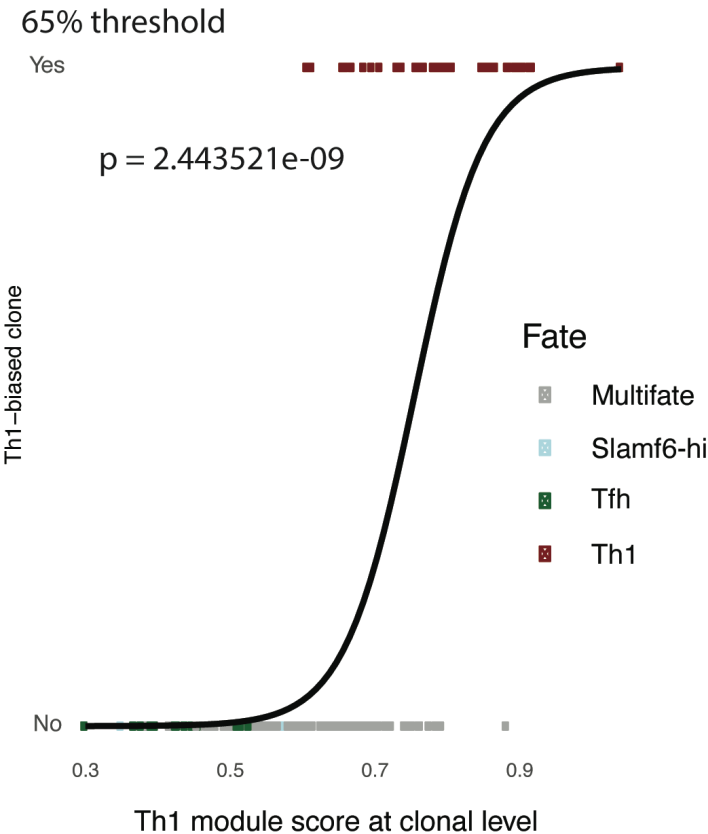

**C**

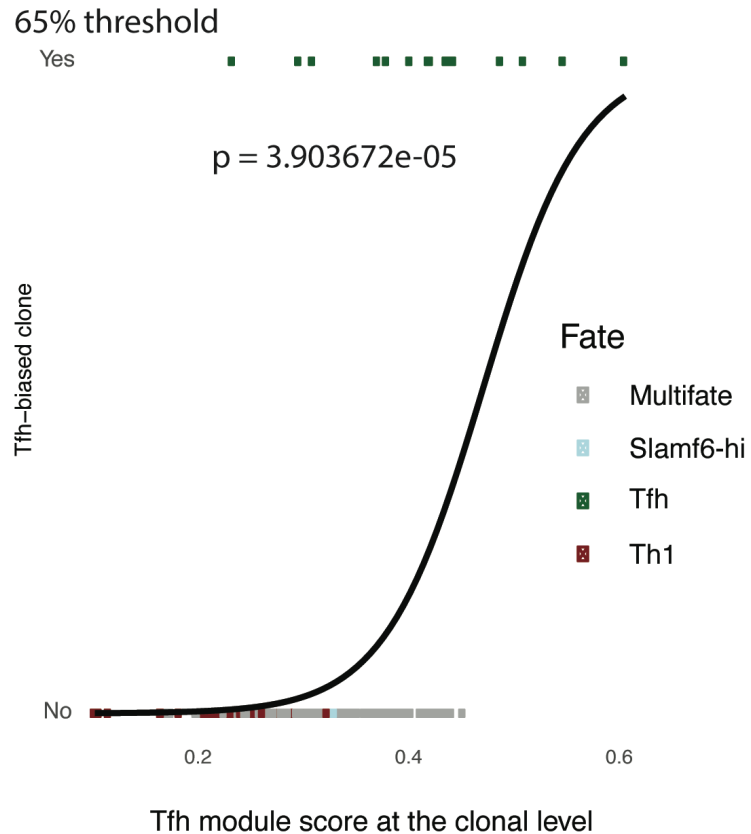

Supplement: supp [file elife_poa_e80079_Figure_3_figure_supplement_1.pdf › elife_poa_e80079_Figure_3_figure_supplement_1.pdf]
